# Supplementary material for: The association between liking, learning and creativity in music
Source: PubMed Central journal article supplement (PMC11329743; doi:10.1038/s41598-024-70027-z), 2024-08-16
Supplement: 41598_2024_70027_MOESM1_ESM.pdf [file 41598_2024_70027_MOESM1_ESM.pdf]

A.

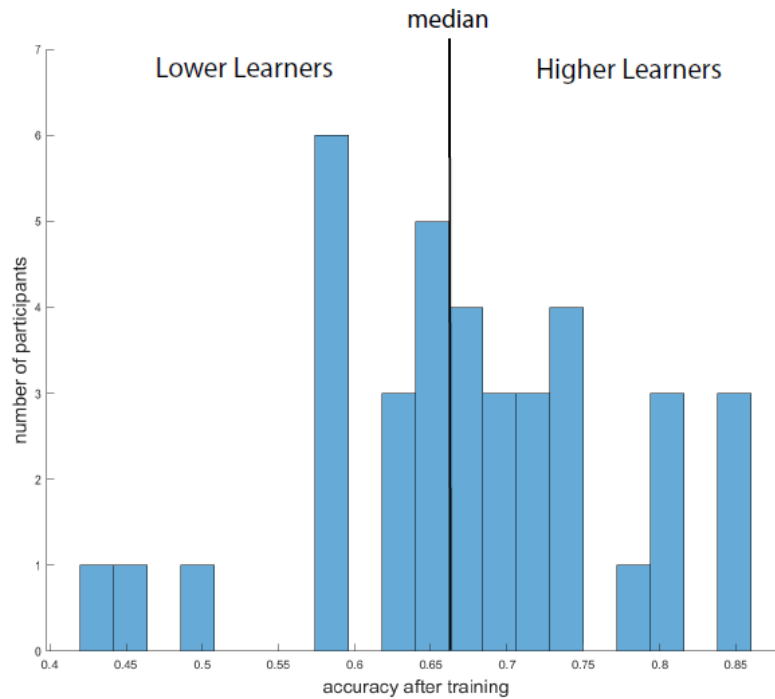

B.

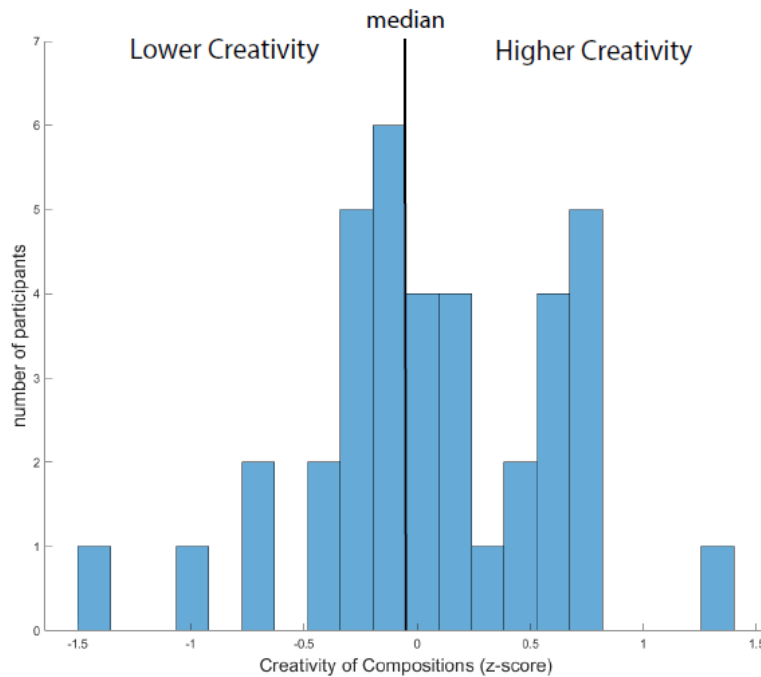

**Fig.S1.** Histograms showing the data distribution of the following: **A.** The accuracy in the post-test session, calculated as the proportion of correct responses to the test notes after training was finished. The median value used to split the learning groups is represented as a solid vertical line; A Shapiro-wilk test of normality shows that the accuracy data is normally distributed ( $p = .537$ ). **B.** The average creativity ratings of the participants' compositions in the post-test session (i.e. after training). A Shapiro-wilk test of normality shows that the creativity score data is normally distributed ( $p = .374$ ). The median value used to split the creativity groups is marked as the solid vertical line.
